# Supplementary material
Source: publisher site journal article supplement (https://www.dovepress.com/article/262888)
Supplement: Supplementary file 1 [file get_supplementary_file.php]

**Serum miR-503 is a candidate biomarker for differentiating metabolic healthy obesity from metabolic unhealthy obesity**

Hai-QingYue1, Ying-Hui Zhou1, Yue Guo1,2, Yi-Chen Tang1, Fang Wang1, Hou-De Zhou1*

1National Clinical Research Center for Metabolic Diseases, Hunan Provincial Key Laboratory for Metabolic Bone Diseases, and Department of Metabolism and Endocrinology, The Second Xiangya Hospital of Central South University, Changsha 410011, Hunan, China.

2Department of Stomatology, the Second Xiangya Hospital, Central South University, Changsha, Hunan, China.

**Contact information:** *Correspondence: [houdezhou@csu.edu.cn](mailto:houdezhou@csu.edu.cn), National Clinical Research Center for Metabolic Diseases, Hunan Provincial Key Laboratory for Metabolic Bone Diseases, and Department of Metabolism and Endocrinology, The Second Xiangya Hospital of Central South University, Changsha 410011, Hunan, China. Phone: +86-0731-85292223; Fax: +86-0731-85533525

**Table S1** The correlation between BMPR1A and miR-503 after adjustment for age and sex.

| Groups | r | *P* value |
| --- | --- | --- |
| MHNW | 0.118 | 0.476 |
| MHO | -0.099 | 0.623 |
| MUO | 0.028 | 0.910 |
| Total | 0.013 | 0.901 |

BMPR1A: bone morphogenetic protein receptor type 1A; miR-503, microRNA-503; r: Pearson’s correlation coefficient. MHNW, metabolically healthy normal weight; MHO, metabolically healthy overweight/obese; MUO, metabolically unhealthy overweight/obese;

**Table S2** Logistic regression analysis for determination of subjects with MHNW and MHO phenotypes.

| Variables | β | OR | 95%CI | | *P* |
| --- | --- | --- | --- | --- | --- |
|  |  | Lower | Upper |  |
| Age | -0.302 | 0.884 | 0.445 | 1.755 | 0.724 |
| Sex | 0.375 | 10.746 | 3.102 | 37.232 | <0.001 |
| BMPR1A | 0.313 | 1.376 | 0.570 | 3.280 | 0.484 |
| Mir-503 | -0.124 | 0.739 | 0.335 | 1.630 | 0.454 |

MHNW, metabolically healthy normal weight; MHO, metabolically healthy overweight/obese; BMPR1A: bone morphogenetic protein receptor type 1A; miR-503, microRNA-503; OR: odds ratio; CI: confidence interval.

**Table S3** Logistic regression analysis for risk factors associated with MHO and MUO subjects.

| Variable | β | OR | 95%CI | | *P* |
| --- | --- | --- | --- | --- | --- |
|  |  | Lower | Upper |  |
| Age | 0.823 | 2.277 | 0.848 | 6.116 | 0.103 |
| Sex | 2.791 | 16.305 | 3.850 | 69.055 | <0.001 |
| BMPR1A | -0.047 | 0.954 | 0.384 | 2.370 | 0.920 |
| Mir-503 | -1.47 | 0.230 | 0.073 | 0.722 | 0.012 |

MHO, metabolically healthy overweight/obese; MUO, metabolically unhealthy overweight/obese subjects; BMPR1A: bone morphogenetic protein receptor type 1A; miR-503, microRNA-503; OR: odds ratio; CI: confidence interval.
